# Supplementary material
Source: ML conference proceedings conference paper supplement (https://proceedings.neurips.cc/paper_files/paper/2022/hash/4990dad2c1696224de42573d0222554a-Abstract.html)
Supplement: Supplementary file 1 [file 4990dad2c1696224de42573d0222554a-Supplemental-Conference.zip]

Archive with 2 entries (2 files):
- CameraReady_Supplements.pdf
- __MACOSX/._CameraReady_Supplements.pdf
